# Supplementary material for: Determinants of access to healthcare by older persons in Uganda: a cross-sectional study
Source: Springer Nature journal article supplement (doi:10.1186/s12939-015-0157-z), 2015-03-06
Supplement: MOESM1 [file 9762526]

## Section 5: Health: All Household Members

Ask the following questions about all members of the household (**usual and regular**).

[illegible]

### Codes for Column 5

- 1= Diarrhoea (acute)
- 2= Diarrhoea (chronic, 1 month or more)
- 3= Weight loss (major)
- 4= Fever (acute)
- 5= Fever (recurring)
- 6= Malaria
- 7= Skin rash
- 8= Weakness
- 9= Severe headache
- 10= Fainting
- 11= Chills (feeling hot and cold)

- 12= Vomiting  
13= Cough  
14= Coughing blood  
15= Pain on passing urine  
16= Genital sores  
17= Mental disorder  
20= Abdominal pain  
21= Sore throat  
22= Difficulty breathing  
23= Burn  
24= Fracture  
25= Wound

- 26= Child birth related  
96= Other (specify)

### Codes for Column 7

- 1= Illness mild
- 2= Facility too far
- 3= Hard to get to facility
- 4= Too dangerous to go
- 5= Available facilities are costly
- 6= No qualified staff present
- 7= Staff attitude not good
- 8= Too busy / long waiting time
